# Supplementary material for: Assessing Alternative Pre-Treatment Methods to Promote Essential Oil Fixation into Cotton and Polyethylene Terephthalate Fiber: A Comparative Study
Source: MDPI journal article supplement (doi:10.3390/polym15061362), 2023-03-09
Supplement: s1 [file s1]

## -Supporting Information-

### 1. Methods

#### *1.1. Air atmospheric plasma treatment of PET fabrics*

**Table. S1:** Machine parameters of air atmospheric plasma treatment

| Parameters               | Values               |
|--------------------------|----------------------|
| Electrical power         | 750 w                |
| Frequency                | 26.0 KHz             |
| Speed                    | 2.0 m/min            |
| Electrode length         | 0.50 m               |
| Inter-electrode distance | 1.50 mm              |
| A treatment power        | 60 kJ/m <sup>2</sup> |

#### *1.2. Testing of olfactory function*

**Table. S2:** Equivalence of odour intensity according the investigator scores

| Score | Odour Intensity |
|-------|-----------------|
| 0     | None            |
| 1     | Very low        |
| 2     | Very low        |
| 3     | Low             |
| 4     | Low +           |
| 5     | Average         |
| 6     | Average +       |
| 7     | Good            |
| 8     | Good +          |

|    |           |
|----|-----------|
| 9  | Very good |
| 10 | Excellent |

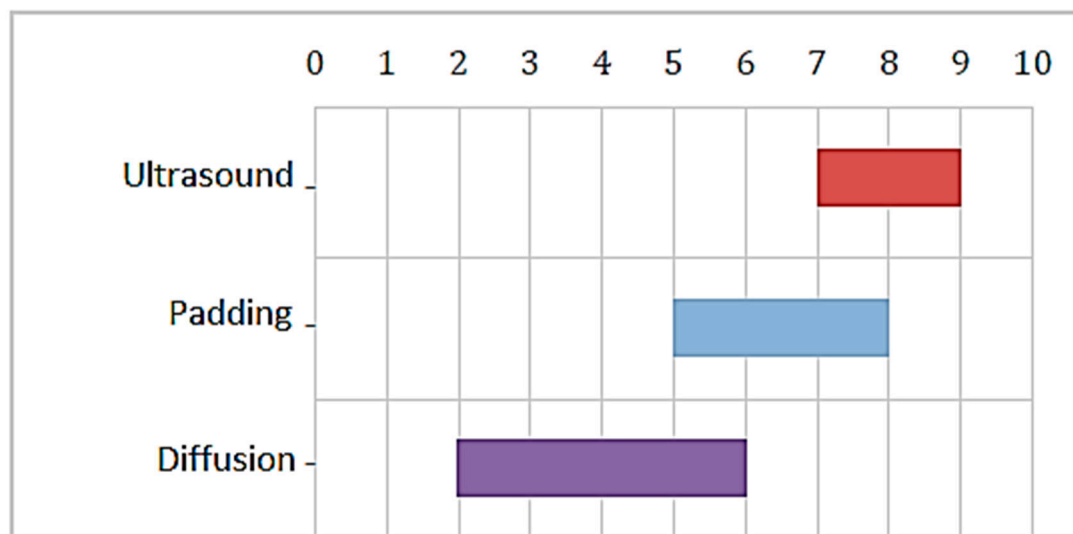

**Figure.S1:** Olfactory identification ability of geranium oil inserted by different processes on cotton fabrics after the 1<sup>st</sup> rub fastness test. The figure showed the resistance of geranium oil after the first rub fastness test.

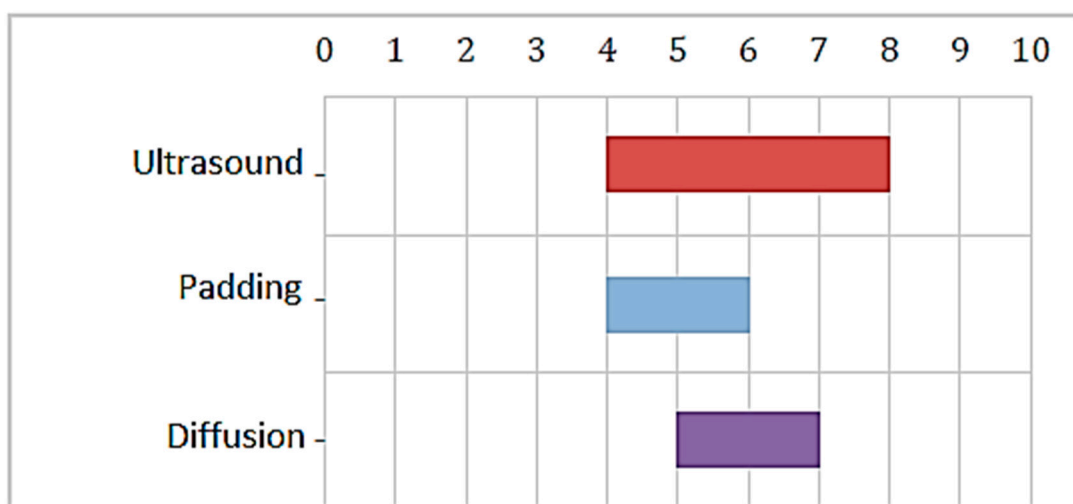

**Figure.S2:** Comparison of pleasant olfactory character of the treated samples with different treatment methods. The results were obtained after the 1<sup>st</sup> rub fastness test.

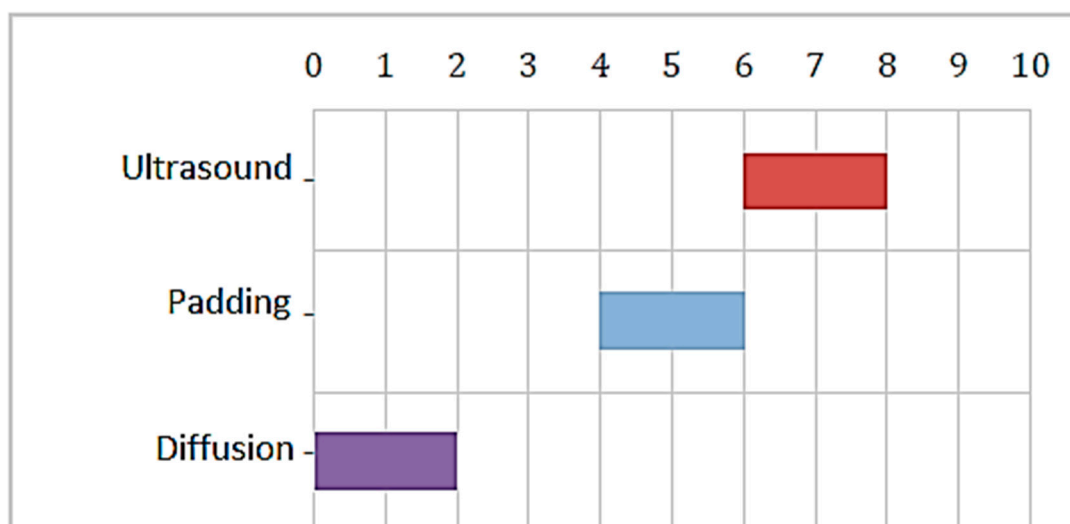

**Figure.S3:** Olfactory identification ability of geranium oil inserted by different processes on cotton fabrics after the 3<sup>rd</sup> rub fastness test. The figure showed the resistance of geranium oil after the third rub fastness test.

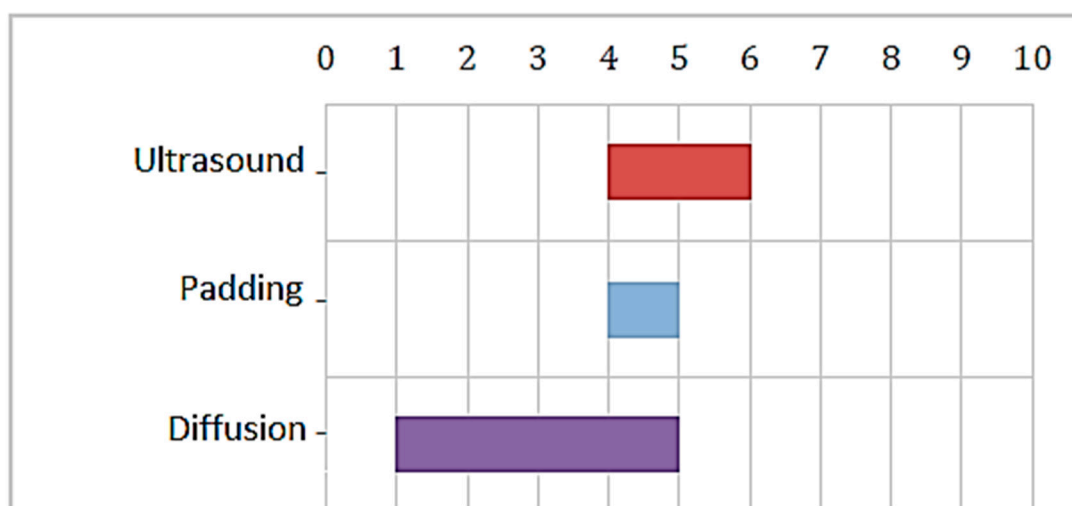

**Figure.S4:** Comparison of pleasant olfactory character of the treated samples with different treatment methods. The results were obtained after the 3<sup>rd</sup> rub fastness test.

# 1. Antibacterial measurements

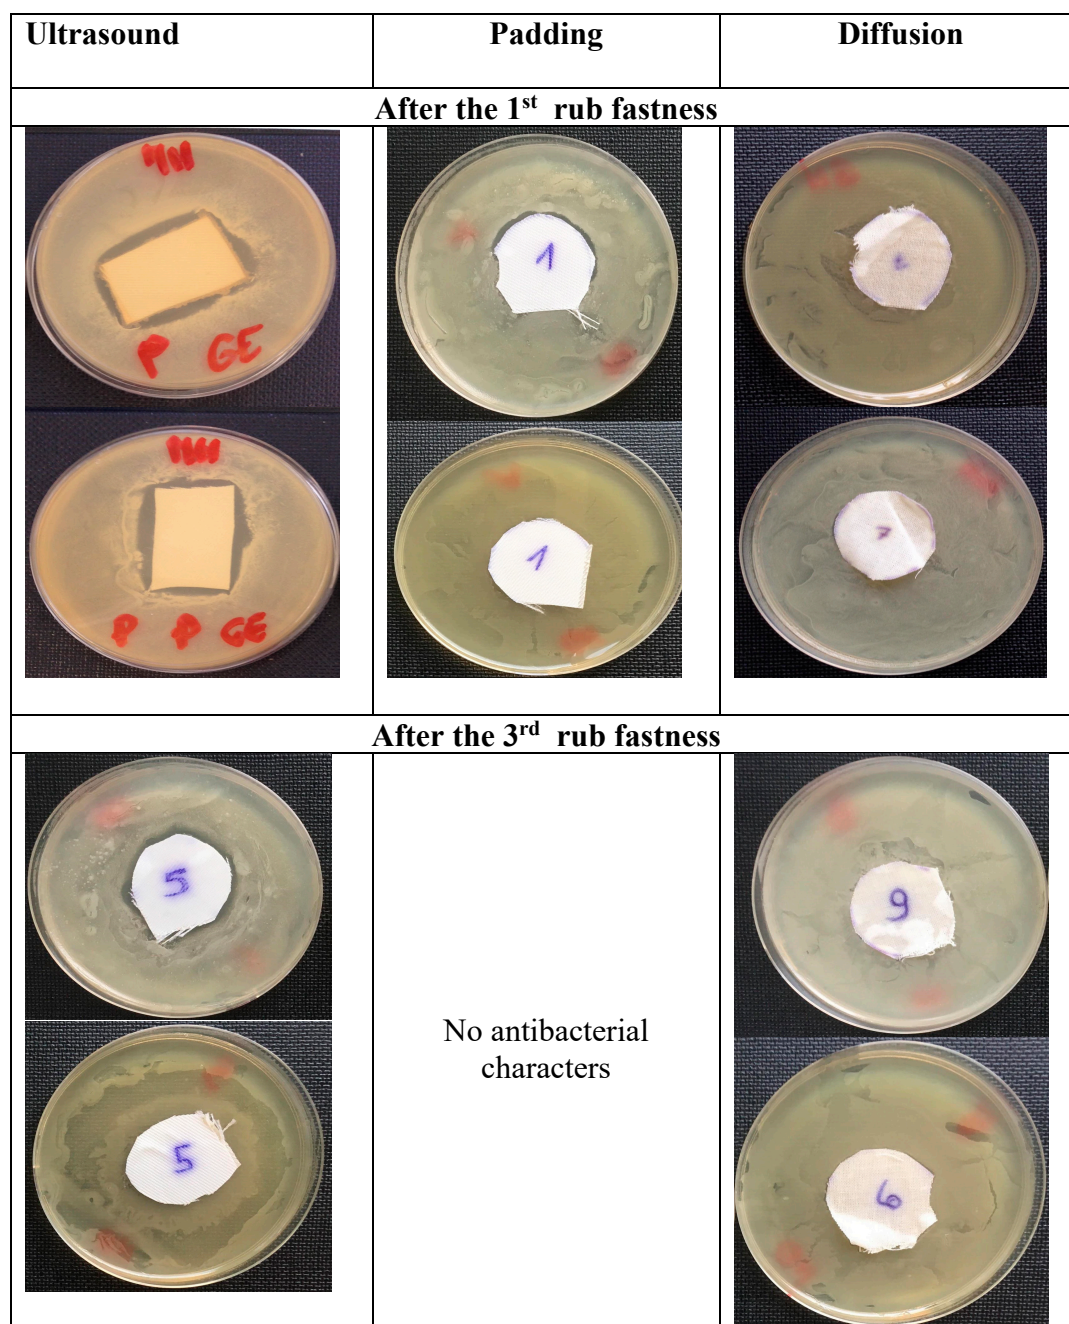

**Figure.S6:** Comparison on the antibacterial activity between ultrasound, diffusion and padding treatment methods. After the 1<sup>st</sup> and 3<sup>rd</sup> rub fastness test.
